# Supplementary material
Source: PubMed Central journal article supplement (PMC4380509)
Supplement: NIHMS61925-supplement-2.pdf [file NIHMS61925-supplement-2.pdf]

Supplementary Table 1

**DNA sequencing statistics.**

Tumours were targeted at a depth of 50X and had a real median depth of 62X (range 52.6-92.3X). A median of 86% of the exome was covered at depths greater than 50X (65.8 - 95.2%). Morphologically normal tissues and blood controls were targeted to a sequence depth of 30X with a median real depth of 34X (range 30.7-38.8X). A median of 81% of the exome was covered at depths greater than 30X (74.2 – 86.5%). A median of 1.8% of the exome was not covered, a median of 95.3% of reads were unique and there was a median of 8.8% unmapped pairs.

| ID         | Target coverage | Gbp Seq | UM Pairs | Unique | Phys X | Seq X | Percentage coverage at read depths |        |        |        |        |        |        |
|------------|-----------------|---------|----------|--------|--------|-------|------------------------------------|--------|--------|--------|--------|--------|--------|
|            |                 |         |          |        |        |       | 1+                                 | 11+    | 21+    | 31+    | 41+    | 51+    | 101+   |
| 0006_Blood | 30x             | 118.83  | 8.50     | 95.93  | 47.27  | 33.52 | 98.22%                             | 97.17% | 93.65% | 82.15% | 47.32% | 11.97% | 0.08%  |
| 0006_N     | 30x             | 122.93  | 10.23    | 97.25  | 57.20  | 34.46 | 98.25%                             | 97.17% | 93.33% | 79.79% | 59.13% | 40.17% | 0.91%  |
| 0006_T1    | 50x             | 231.87  | 10.71    | 94.96  | 98.49  | 62.34 | 98.08%                             | 97.33% | 96.66% | 95.23% | 92.30% | 86.71% | 17.69% |
| 0006_T2    | 50x             | 225.77  | 9.39     | 94.52  | 96.11  | 62.01 | 98.29%                             | 97.76% | 97.25% | 96.05% | 93.14% | 87.36% | 15.11% |
| 0006_T3    | 50x             | 223.25  | 8.60     | 95.37  | 100.70 | 62.55 | 98.09%                             | 97.24% | 96.44% | 94.77% | 91.59% | 86.30% | 8.10%  |
| 0006_T4    | 50x             | 206.91  | 9.14     | 95.42  | 87.73  | 57.53 | 98.33%                             | 97.79% | 97.21% | 95.65% | 92.01% | 84.12% | 11.09% |
| 0007_Blood | 30x             | 108.31  | 8.29     | 96.69  | 46.71  | 30.73 | 98.03%                             | 96.69% | 91.96% | 74.65% | 36.70% | 8.08%  | 0.07%  |
| 0007_N     | 30x             | 109.56  | 8.98     | 97.62  | 48.58  | 31.24 | 98.30%                             | 97.05% | 91.91% | 74.17% | 49.60% | 28.30% | 0.16%  |
| 0007_T1    | 50x             | 224.97  | 10.01    | 94.59  | 98.44  | 61.14 | 98.17%                             | 97.41% | 96.56% | 94.72% | 91.38% | 85.76% | 4.60%  |
| 0007_T2    | 50x             | 189.37  | 8.68     | 96.10  | 85.08  | 53.34 | 98.23%                             | 97.56% | 96.78% | 94.64% | 89.33% | 78.14% | 8.80%  |
| 0007_T3    | 50x             | 228.58  | 8.27     | 94.68  | 99.13  | 63.75 | 98.30%                             | 97.76% | 97.28% | 96.18% | 93.78% | 89.05% | 19.61% |
| 0007_T4    | 50x             | 230.28  | 8.64     | 95.03  | 106.71 | 64.09 | 98.25%                             | 97.57% | 97.06% | 95.94% | 93.53% | 88.93% | 16.41% |
| 0007_T5    | 50x             | 210.12  | 8.78     | 95.20  | 88.30  | 58.48 | 98.30%                             | 97.67% | 97.09% | 95.63% | 92.45% | 85.91% | 6.16%  |
| 0008_Blood | 30x             | 123.45  | 8.48     | 96.58  | 52.59  | 35.06 | 98.23%                             | 97.23% | 94.19% | 83.79% | 58.37% | 25.85% | 0.13%  |
| 0008_N     | 30x             | 137.11  | 9.36     | 97.17  | 61.12  | 38.81 | 98.32%                             | 97.50% | 95.19% | 86.54% | 69.41% | 50.84% | 1.81%  |
| 0008_T1    | 50x             | 221.14  | 8.75     | 87.77  | 87.62  | 56.90 | 98.09%                             | 97.02% | 95.06% | 90.46% | 80.09% | 65.82% | 0.26%  |
| 0008_T2    | 50x             | 203.19  | 8.22     | 87.95  | 74.38  | 52.57 | 98.22%                             | 97.61% | 96.78% | 94.03% | 90.06% | 78.11% | 0.26%  |
| 0008_T3    | 50x             | 340.00  | 9.46     | 93.42  | 145.33 | 92.27 | 98.47%                             | 97.92% | 97.60% | 97.18% | 96.46% | 95.22% | 66.91% |

Supplementary Table 2

**Clinical characteristics of prostate cancers at initial diagnosis**

**a** Initial Diagnosis.

| Case Ref | PSA at diagnosis | Clinical Stage at diagnosis | Pathological Stage | Gleason Score | Gleason Sum | Progression                         |
|----------|------------------|-----------------------------|--------------------|---------------|-------------|-------------------------------------|
| Case 6   | 7                | T1NxMx                      | T3aN0Mx            | 3+4           | 7           | Alive and relapse free at 43 months |
| Case 7   | 10.1             | T1NxMx                      | T3aN0Mx            | 3+4           | 7           | Alive and relapse free at 42 months |
| Case 8   | 6.7              | T1N0Mx                      | T3aNxMx            | 3+4           | 7           | Alive and relapse free at 36 months |

**b** Gleason of samples selected for DNA sequencing.

| Sample  | SangerID | Gleason |
|---------|----------|---------|
| 6_T1    | PD7445a  | 3+4=7   |
| 6_T2    | PD7445c  | 3+4=7   |
| 6_T3    | PD7445d  | 3+4=7   |
| 6_T4    | PD7445e  | 3+3=6   |
| 6_N     | PD7445f  |         |
| 6_Blood | PD7445b  |         |
| 7_T1    | PD7446a  | 3+3=6   |
| 7_T2    | PD7446c  | 4+3=7   |
| 7_T3    | PD7446d  | 3+3=6   |
| 7_T4    | PD7446e  | 3+4=7   |
| 7_T5    | PD7446f  | 3+4=7   |
| 7_N     | PD7446g  |         |
| 7_Blood | PD7446b  |         |
| 8_T1    | PD7447a  | 3+4=7   |
| 8_T2    | PD7447c  | 4+3=7   |
| 8_T3    | PD7447d  | 3+3=6   |
| 8_N     | PD7447e  |         |
| 8_Blood | PD7447b  |         |

Supplementary Table 3

**A list of potential prostate cancer driver genes.**

A list of potential prostate cancer driver genes compiled from Grasso *et al.*<sup>6</sup>, Garraway *et al.*<sup>7</sup> and the ICGC DCC 16 release. Mutations were classed as potential driver mutations if they were recurrent and made a coding change or occurred within a splice site. For the ICGC dataset the mutation had to have high functional impact and appear in three or more donors. This gave 5542 potential driver genes. Out of these 91 genes were affected by coding mutations or mutations occurring in the splice site in the complex men dataset and are shown in this table. Mutations in 44 genes occurred in two samples within a patient. The fact that there were no potential drivers found in more than two samples suggests that these drivers are likely to be late metastatic drivers. *DCC* was the only potential driver gene that occurred in more than one patient. No genes were mutated independently in more than one sample from the same patient i.e. convergent evolution was not found. Well known cancer genes such as *ATM*, *KIT*, and *PTEN* were mutated. A number of potential driver genes were observed in morphologically normal tissue: in 7\_N we detected *BCAT1* (Garraway), *CHPF2* (Grasso), & *FAT2* (Grasso, & Garraway) and in 6\_N we found *RYR3* (Grasso, Garraway and ICGC).

| Samples          | Gene             | P.Description | Type                        | num samples | num hits | source                  |
|------------------|------------------|---------------|-----------------------------|-------------|----------|-------------------------|
| 0008_T1, 0008_T2 | <i>DCC</i>       | p.V963I       | missense                    | 2           | 2        | Garraway                |
| 0006_T1, 0006_T2 | <i>DCC</i>       | p.Y341H       | missense                    | 2           | 2        | Garraway                |
| 0007_T1, 0007_T2 | <i>ABCF3</i>     | p.R269W       | missense                    | 2           | 1        | Tomlins, Garraway       |
| 0007_T1, 0007_T2 | <i>ADAMTS18</i>  | p.R1014H      | missense                    | 2           | 1        | Garraway                |
| 0006_T1, 0006_T2 | <i>AGAP2</i>     | p.?           | splice                      | 2           | 1        | Tomlins, Garraway       |
| 0006_T1, 0006_T2 | <i>ANKRD17</i>   | p.T1972A      | missense                    | 2           | 1        | Tomlins                 |
| 0006_T1, 0006_T2 | <i>ANKRD50</i>   | p.R324fs*7    | frameshift_variant          | 2           | 1        | Tomlins, Garraway       |
| 0008_T1, 0008_T2 | <i>ATG9A</i>     | p.C122Y       | missense                    | 2           | 1        | Tomlins                 |
| 0008_T1, 0008_T2 | <i>ATM</i>       | p.L1439P      | missense                    | 2           | 1        | Tomlins, Garraway, ICGC |
| 0006_T1, 0006_T4 | <i>CALCRL</i>    | p.W399C       | missense                    | 2           | 1        | Tomlins                 |
| 0007_T4, 0007_T5 | <i>CCDC105</i>   | p.A292T       | missense                    | 2           | 1        | Tomlins                 |
| 0008_T1, 0008_T2 | <i>CEACAM1</i>   | p.E490K       | missense                    | 2           | 1        | Tomlins                 |
| 0006_T1, 0006_T4 | <i>CHSY3</i>     | p.R527C       | missense                    | 2           | 1        | Tomlins                 |
| 0006_T1, 0006_T4 | <i>CNGA4</i>     | p.R213C       | missense                    | 2           | 1        | Tomlins, Garraway       |
| 0006_T1, 0006_T2 | <i>EPB41L3</i>   | p.A921T       | missense                    | 2           | 1        | Garraway, ICGC          |
| 0006_T1, 0006_T4 | <i>FBN2</i>      | p.G721S       | missense                    | 2           | 1        | Tomlins, Garraway       |
| 0008_T1, 0008_T2 | <i>FLG</i>       | p.R3907C      | missense                    | 2           | 1        | Tomlins, Garraway       |
| 0006_T1, 0006_T4 | <i>FLNB</i>      | p.N1285S      | missense                    | 2           | 1        | Tomlins, Garraway       |
| 0006_T1, 0006_T4 | <i>G6PC</i>      | p.E319K       | missense                    | 2           | 1        | Garraway                |
| 0007_T1, 0007_T2 | <i>HIC1</i>      | p.P411L       | missense                    | 2           | 1        | Garraway                |
| 0006_T1, 0006_T2 | <i>HIST1H2BJ</i> | p.V112E       | missense                    | 2           | 1        | Garraway                |
| 0006_T1, 0006_T4 | <i>KCNK9</i>     | p.A320T       | missense                    | 2           | 1        | Tomlins                 |
| 0007_T4, 0007_T5 | <i>KCTD8</i>     | p.R407H       | missense                    | 2           | 1        | Tomlins, Garraway       |
| 0007_T1, 0007_T2 | <i>KIT</i>       | p.Q79K        | missense                    | 2           | 1        | Tomlins                 |
| 0006_T1, 0006_T2 | <i>LCA5</i>      | p.S32C        | missense                    | 2           | 1        | Garraway                |
| 0006_T1, 0006_T4 | <i>MEGF10</i>    |               | SPLICE_REGION_VAR insertion | 2           | 1        | Tomlins                 |
| 0008_T1, 0008_T2 | <i>MIA3</i>      | p.P1170S      | missense                    | 2           | 1        | Garraway                |
| 0008_T1, 0008_T2 | <i>MYH2</i>      | p.R1755H      | missense                    | 2           | 1        | Tomlins, Garraway       |
| 0008_T1, 0008_T2 | <i>MYH7</i>      | p.R1420Q      | missense                    | 2           | 1        | Tomlins, Garraway       |
| 0006_T1, 0006_T4 | <i>MYO1F</i>     | p.L191V       | missense                    | 2           | 1        | Tomlins                 |
| 0008_T1, 0008_T2 | <i>ODZ3</i>      | p.Y2318D      | missense                    | 2           | 1        | Tomlins, Garraway       |
| 0007_T1, 0007_T2 | <i>OR5H6</i>     | p.L71F        | missense                    | 2           | 1        | Tomlins                 |
| 0006_T1, 0006_T2 | <i>PCDH11X</i>   | p.R1188*      | nonsense                    | 2           | 1        | Garraway                |
| 0008_T1, 0008_T2 | <i>PHF10</i>     | p.A71G        | missense                    | 2           | 1        | Garraway                |
| 0007_T4, 0007_T5 | <i>PIPOX</i>     | p.I316T       | missense                    | 2           | 1        | Garraway                |
| 0006_T1, 0006_T2 | <i>ROS1</i>      | p.T2045K      | missense                    | 2           | 1        | Tomlins, Garraway       |
| 0006_T1, 0006_T2 | <i>RPGRIP1</i>   | p.G917R       | missense                    | 2           | 1        | Tomlins                 |
| 0007_T1, 0007_T2 | <i>SF3B1</i>     | p.K700E       | missense                    | 2           | 1        | Tomlins, Garraway       |
| 0006_T1, 0006_T4 | <i>SKIV2L2</i>   | p.G930fs*30   | frameshift_variant          | 2           | 1        | Tomlins                 |
| 0008_T1, 0008_T2 | <i>SMCHD1</i>    | p.G68D        | missense                    | 2           | 1        | Garraway                |

|                  |                |             |                    |   |   |                         |
|------------------|----------------|-------------|--------------------|---|---|-------------------------|
| 0006_T1, 0006_T2 | <i>SORBS1</i>  | p.S1230L    | missense           | 2 | 1 | Garraway                |
| 0006_T1, 0006_T2 | <i>TNNT3</i>   | p.R99H      | missense           | 2 | 1 | Garraway                |
| 0007_T1, 0007_T2 | <i>UBR4</i>    | p.R450G     | missense           | 2 | 1 | Garraway                |
| 0006_T1, 0006_T4 | <i>ZC3H13</i>  | p.E754fs*28 | frameshift_variant | 2 | 1 | Tomlins, Garraway       |
| 0007_T1, 0007_T2 | <i>ZNF208</i>  | p.T1001S    | missense           | 2 | 1 | Garraway                |
| 0008_T1          | <i>AASDH</i>   | p.E182K     | missense           | 1 | 1 | Garraway                |
| 0007_T2          | <i>ABI3BP</i>  | p.R717*     | nonsense           | 1 | 1 | Tomlins, Garraway       |
| 0006_T3          | <i>ADAP2</i>   | p.M77I      | missense           | 1 | 1 | Tomlins                 |
| 0006_T1          | <i>ASTN1</i>   | p.?         | splice             | 1 | 1 | Tomlins, Garraway       |
| 0007_N           | <i>BCAT1</i>   | p.L276M     | missense           | 1 | 1 | Garraway                |
| 0006_T3          | <i>CEP110</i>  | p.R1431C    | missense           | 1 | 1 | Tomlins                 |
| 0006_T2          | <i>CHD5</i>    | p.R471Q     | missense           | 1 | 1 | Garraway                |
| 0007_N           | <i>CHPF2</i>   | p.R470L     | missense           | 1 | 1 | Tomlins                 |
| 0006_T3          | <i>DCAF8L1</i> | p.R152Q     | missense           | 1 | 1 | Tomlins                 |
| 0006_T3          | <i>DGKG</i>    | p.D634N     | missense           | 1 | 1 | Tomlins                 |
| 0006_T1          | <i>DNPEP</i>   | p.E215V     | missense           | 1 | 1 | Garraway                |
| 0007_T1          | <i>FAM135B</i> | p.A300T     | missense           | 1 | 1 | Tomlins, Garraway       |
| 0007_N           | <i>FAT2</i>    | p.S4308T    | missense           | 1 | 1 | Tomlins, Garraway       |
| 0007_T5          | <i>FREM2</i>   | p.V1477A    | missense           | 1 | 1 | Tomlins, Garraway       |
| 0006_T3          | <i>GALNT13</i> | p.W128*     | nonsense           | 1 | 1 | Garraway                |
| 0006_T2          | <i>GBP7</i>    | p.D97G      | missense           | 1 | 1 | Tomlins                 |
| 0006_T3          | <i>GLUD1</i>   | p.G72R      | missense           | 1 | 1 | Garraway                |
| 0007_T5          | <i>KCNJ4</i>   | p.T131M     | missense           | 1 | 1 | Tomlins                 |
| 0006_T4          | <i>KIF19</i>   | p.?         | essential splice   | 1 | 1 | Garraway                |
| 0006_T2          | <i>KIF1A</i>   | p.M1484V    | missense           | 1 | 1 | Tomlins, Garraway       |
| 0007_T5          | <i>KIF2B</i>   | p.R36C      | missense           | 1 | 1 | Tomlins                 |
| 0006_T4          | <i>KLHL11</i>  | p.H482N     | missense           | 1 | 1 | Tomlins                 |
| 0006_T3          | <i>KPNA7</i>   | p.A440E     | missense           | 1 | 1 | Tomlins                 |
| 0006_T4          | <i>LRP4</i>    | p.P946A     | missense           | 1 | 1 | Tomlins, Garraway, ICGC |
| 0006_T2          | <i>MEIS2</i>   | p.R131C     | missense           | 1 | 1 | Tomlins                 |
| 0006_T2          | <i>MYC</i>     | p.P177R     | missense           | 1 | 1 | Tomlins                 |
| 0006_T2          | <i>OGDH</i>    | p.H670N     | missense           | 1 | 1 | Tomlins                 |
| 0006_T2          | <i>PCDHA2</i>  | p.R47C      | missense           | 1 | 1 | Tomlins, Garraway       |
| 0006_T4          | <i>PCDHA3</i>  | p.R65W      | missense           | 1 | 1 | Garraway                |
| 0006_T4          | <i>PCDHB11</i> | p.Y279F     | missense           | 1 | 1 | Garraway                |
| 0007_T5          | <i>PCSK2</i>   | p.G366S     | missense           | 1 | 1 | Tomlins                 |
| 0006_T1          | <i>PDS5A</i>   | p.?         | splice             | 1 | 1 | Garraway                |
| 0006_T4          | <i>PLEC</i>    | p.V2825E    | missense           | 1 | 1 | Tomlins, Garraway       |
| 0006_T1          | <i>PTEN</i>    | p.I253N     | missense           | 1 | 1 | Tomlins, Garraway, ICGC |
| 0006_T1          | <i>RP1</i>     | p.S440L     | missense           | 1 | 1 | Tomlins, Garraway       |
| 0006_T1          | <i>RYR2</i>    | p.V3597A    | missense           | 1 | 1 | Tomlins, Garraway, ICGC |
| 0006_N           | <i>RYR3</i>    | p.A525S     | missense           | 1 | 1 | Tomlins, Garraway, ICGC |
| 0007_T2          | <i>SDHA</i>    | p.M1V       | missense           | 1 | 1 | Garraway                |
| 0006_T2          | <i>SEMA3D</i>  | p.R294H     | missense           | 1 | 1 | Tomlins, Garraway       |
| 0006_T1          | <i>SETX</i>    | p.I2150T    | missense           | 1 | 1 | Tomlins, Garraway       |
| 0007_T3          | <i>SH3RF2</i>  | p.R286C     | missense           | 1 | 1 | Tomlins                 |
| 0006_T1          | <i>SLC13A3</i> | p.M510I     | missense           | 1 | 1 | Tomlins                 |
| 0006_T2          | <i>SLC22A2</i> | p.E527K     | missense           | 1 | 1 | Tomlins                 |
| 0006_T3          | <i>SPAG17</i>  | p.L476I     | missense           | 1 | 1 | Tomlins, Garraway       |
| 0007_T3          | <i>STAB1</i>   | p.I1704T    | missense           | 1 | 1 | Tomlins, Garraway       |
| 0007_T2          | <i>TEKT3</i>   | p.R437C     | missense           | 1 | 1 | Garraway                |
| 0006_T4          | <i>ZNF236</i>  | p.F976L     | missense           | 1 | 1 | Tomlins, Garraway       |

## ICGC PROSTATE GROUP Membership (in addition to those named in the author list).

Steve Bova  
Freddie Hamdy  
Yong-Jie Lu  
Anthony Ng  
Yongwei Yu  
Hongwei Zhang

## DISCUSSION OF SOMATIC MOSAICISM

The recent publication by Holstege *et al*<sup>1</sup> raises the possibility that the mutation that we observed in morphologically normal prostate tissue may arise through somatic mosaicism. Here we show that the processes occurring in morphologically normal prostate and those reported by Holstege *et al*<sup>1</sup> are distinct.

There are a number of considerations:

1. First, the rate of mutation in human cells is thought to be around 1-2.5 mutation per cell division<sup>2,3</sup>. At this rate of mutation around 200-500 cell divisions would have had to occur in the single progenitor cell that gives rise to the mutated clones of cells that we observe in morphologically normal prostate (we observed 518 mutations in morphologically normal tissue from Case 6 and 454 mutations in Case 7).
2. The samples of DNA that we prepare from morphologically normal prostate are around 20-30 micrograms, a portion of which (1-2 micrograms) was subject to DNA sequencing. This means that our DNA samples are prepared from a minimum of about 4,000,000 cells (6pg of DNA per cell, assuming 100% DNA yield). To generate this tissue sample a single somatic prostate cell containing 500 mutations would have to undergo a minimum of 20-24 additional doublings: possibly many more since it would have to grow out against competition from other cells in the prostate.
3. In our manuscript we argued that selection would be involved in generating the clone of morphologically normal cells containing high mutational burden, but it is theoretically possible that the clone could arise by somatic mosaicism. However, even if somatic mosaicism is involved, the overall process would still have to be accompanied by a high rate of cell division and/or high (per cell division) rate of mutation. In a model involving somatic mosaicism the clone of cells could then arise without selection through genetic drift (or from an origin in prostate stem cells) only in the context of high rates of cell division, a property that is documented to be absent in morphologically normal prostate tissue<sup>4</sup>, and/or high mutation rate. There is no evidence to support either of these possibilities in normal prostate development. Our work highlights the presence of high mutation rates in morphologically normal prostate tissue for the first time and will prompt future studies to provide clearer insights into the mechanisms and the effects on pathogenesis.
4. We have compared our findings with data obtained by Holstege *et al*<sup>1</sup> who examined the total white blood cell DNA from a 115-year old woman: in contrast to morphologically normal prostate it is well documented that hematopoietic cells have a high rate of cell turnover<sup>5</sup>. They found evidence for somatic mosaicism with the blood sample containing approximately 424 somatic mutations. By comparison no verifiable mutations were detected in similarly analysed normal brain tissue. Hematopoietic stem cells are thought to renew once or twice per year giving rise to

multi-potent progenitor that through hematopoiesis yields diverse blood cell types<sup>5</sup>. A rate of 2.5 accumulated somatic mutations per cell division and 200 doublings (~2 per year) would account for the figure of 424 mutations.

5. Critically in the study presented by Holstege *et al*<sup>1</sup> there was a high level of attrition of telomeres in the white blood cells, compared to intermediate length of telomeres in most other tissue, and long telomeres in non-dividing tissue (brain), consistent with the differences in cell turnover in these tissues. When we examined telomere length using the TelSeq tool<sup>6</sup> we found telomere lengths of 6.3kb in morphologically normal tissue from Patient 6, and 6.2kb in Patient 7. The telomeres in the corresponding cancers were slightly longer than in morphologically normal tissue in Patient 6 and the same in Patient 7. We concluded that the somatic mosaicism observed in white blood cells from the study of Holstege *et al*<sup>1</sup> was distinct from the phenomena that we were observing in the morphologically normal prostate; based on the absence of high levels of telomere attrition, and on the higher mutation rate observed in prostate, a tissue believed to be relatively quiescent. Also men in our study are younger than the patient presented by Holstege *et al*) (59 and 71 for cases 7 and 6 respectively, compared to 115).

## References

1. Holstege, H. *et al*. Somatic mutations found in the healthy blood compartment of a 115-yr-old woman demonstrate oligoclonal hematopoiesis. *Genome Res.* **24**, 733–742 (2014).
2. Zong, C., Lu, S., Chapman, A. R. & Xie, X. S. Genome-wide detection of single-nucleotide and copy-number variations of a single human cell. *Science* **338**, 1622–1626 (2012).
3. Nussbaum, R., McInnes, R. R. & Willard, H. F. Thompson & Thompson Genetics in Medicine - Robert Nussbaum, Roderick R. McInnes, Huntington F Willard - Google Books. (2007).
4. Mucci, N. R. *et al*. Expression of nuclear antigen Ki-67 in prostate cancer needle biopsy and radical prostatectomy specimens. *J. Natl. Cancer Inst.* **92**, 1941–1942 (2000).
5. Catlin, S. N., Busque, L., Gale, R. E., Gutter, P. & Abkowitz, J. L. The replication rate of human hematopoietic stem cells in vivo. *Blood* **117**, 4460–4466 (2011).
6. Ding, Z. *et al*. Estimating telomere length from whole genome sequence data. *Nucleic Acids Res.* **42**, e75 (2014).

## REFERENCES FOR SUPPLEMENTARY FIGURES AND TABLES

1. Clark, J. *et al*. Complex patterns of ETS gene alteration arise during cancer development in the human prostate. *Oncogene* **27**, 1993–2003 (2008).
2. Nik-Zainal, S. *et al*. The life history of 21 breast cancers. *Cell* **149**, 994–1007 (2012).
3. Nik-Zainal, S. *et al*. Mutational processes molding the genomes of 21 breast cancers. *Cell* **149**, 979–993 (2012).
4. Alexandrov, L. B., Nik-Zainal, S., Wedge, D. C., Campbell, P. J. & Stratton, M. R. Deciphering signatures of mutational processes operative in human cancer. *Cell Rep* **3**, 246–259 (2013).
5. Baca, S. C. *et al*. Punctuated evolution of prostate cancer genomes. *Cell* **153**, 666–677 (2013).
6. Grasso, C. S. *et al*. The mutational landscape of lethal castration-resistant prostate cancer. *Nature* **487**, 239–243 (2012).
7. Barbieri, C. E. *et al*. Exome sequencing identifies recurrent SPOP, FOXA1 and MED12 mutations in prostate cancer. *Nat. Genet.* **44**, 685–689 (2012).
